1 **Title**

2 **Structure and function of a bacterial gap junction analog**

3

4 **Authors**

5 Gregor L. Weiss<sup>1+</sup>, Ann-Katrin Kieninger<sup>2+</sup>, Iris Maldener<sup>2\*</sup>, Karl Forchhammer<sup>2</sup>,

6 Martin Pilhofer<sup>1†</sup>

7

8 **Affiliations**

9 <sup>1</sup> Department of Biology, Institute of Molecular Biology & Biophysics, Eidgenössische  
10 Technische Hochschule Zürich, Otto-Stern-Weg 5, 8093 Zürich, Switzerland

11 <sup>2</sup> Interfaculty Institute of Microbiology and Infection Medicine Tübingen, Organismic  
12 Interactions, University of Tübingen, Auf der Morgenstelle 28, 72076 Tübingen,  
13 Germany

14 + both authors contributed equally to this work

15 \* corresponding authors: [pilhofer@biol.ethz.ch](mailto:pilhofer@biol.ethz.ch); [iris.maldener@uni-tuebingen.de](mailto:iris.maldener@uni-tuebingen.de)

16 † lead contact: [pilhofer@biol.ethz.ch](mailto:pilhofer@biol.ethz.ch)

17

## 18 **Summary**

19 Multicellular lifestyle requires cell-cell connections. In multicellular cyanobacteria,  
20 septal junctions enable molecular exchange between sister cells and are required  
21 for cellular differentiation. The structure of septal junctions is poorly understood  
22 and it is unknown whether they regulate intercellular communication.

23 Here we resolved the *in situ* architecture of septal junctions by electron  
24 cryotomography of cryo-focused ion beam-milled cyanobacteria. Septal junctions  
25 consisted of a tube traversing the septal peptidoglycan. Each tube end comprised  
26 a plug that was covered by a cytoplasmic cap. Fluorescence recovery after  
27 photobleaching showed that intercellular communication was blocked upon stress.  
28 This gating was accompanied by a conformational change of the septal junctions,  
29 mediated by the proteins FraC/D.

30 We provide the mechanistic framework for a cell junction that predates eukaryotic  
31 gap junctions by a billion years. The conservation of a gated dynamic mechanism  
32 across different domains of life emphasizes the importance of controlling  
33 molecular exchange, e.g. upon injury.

34

## 35 **Keywords**

36 multicellularity; cell-cell connections; membrane trafficking; septal junctions;  
37 cyanobacteria; electron cryotomography; subtomogram averaging; fluorescence  
38 recovery after photobleaching; membrane transport; membrane potential

## 39 **Introduction**

40 The evolution of multicellular organisms allowed to divide specialized tasks among  
41 sister cells and led to the invention of structures mediating intercellular molecular  
42 exchange (Brunet and King, 2017). Metazoan cells communicate via gap junctions,  
43 which are multimeric protein complexes that form two hemi-channels and can control  
44 molecular exchange by a dynamic conformational change (Hervé and Derangeon,  
45 2013; Unwin and Zampighi, 1980). In plants, plasmodesmata generate continuity  
46 between the cytoplasm of neighboring cells, however, they are mainly composed of  
47 membranes, their structure is highly heterogeneous, and closing is possible by  
48 polysaccharide (callose) deposition on a time scale of only hours to days (Oparka et  
49 al., 1999; Sager and Lee, 2014).

50 Filamentous cyanobacteria are true multicellular organisms. Under nitrogen limiting  
51 conditions, strains of the order *Nostocales* differentiate N<sub>2</sub>-fixing heterocysts in a  
52 semiregular pattern along the filament, which supply the neighboring vegetative cells  
53 with nitrogen-fixation products in form of glutamine and dipeptide  $\beta$ -aspartyl-arginine  
54 (Burnat et al., 2014; Thomas et al., 1977). Vegetative cells, in turn, fix CO<sub>2</sub> via  
55 oxygenic photosynthesis and provide heterocysts with sucrose as a carbon and  
56 energy source (Cumino et al., 2007; Jüttner, 1983). In addition to metabolites,  
57 signaling molecules need to be exchanged to establish the correct pattern of  
58 differentiated cells along the filament.

59 Transport between neighboring cells occurs by diffusion through the septa, as shown  
60 by tracer molecules like fluorescent calcein with a weight of ~620 Da (Flores et al.,  
61 2016; Mullineaux et al., 2008; Nieves-Mori3n et al., 2017). The exchange of  
62 molecules through the septal peptidoglycan (PG) cell wall requires an array of 80 to  
63 150 nanopores, generated by cell wall-lytic amidases in the model organisms *Nostoc*

64 *punctiforme* and *Anabaena* sp. PCC 7120 (here *Anabaena*) (Bornikoel et al., 2017;  
65 Lehner et al., 2013). It has been speculated that the nanopores, together with any of  
66 the septal proteins SepJ, FraC and FraD, form so-called ‘septal junctions’ (SJs). SJs  
67 might establish a direct connection between the cytoplasm of neighboring cells,  
68 spanning the entire periplasmic space (Flores et al., 2016; Wilk et al., 2011). Even  
69 though cyanobacterial SJs represent an ancient type of cell junction, their structure  
70 and composition, as well as whether they can control cell-cell communication is  
71 unknown.

72

## 73 **Results and Discussion**

### 74 ***In situ* architecture of septal junctions reveals tube, plug and cap modules**

75 Here, we imaged *Anabaena* cells by electron cryotomography (ECT) to reveal the  
76 architecture of SJs *in situ* and in a near-native state. To obtain a sample that was  
77 thin enough for ECT imaging, we plunge-froze cells on electron microscopy (EM)  
78 grids and prepared lamellae using cryo-focused ion beam (FIB) milling (Figure S1)  
79 (Marko et al., 2007; Medeiros et al., 2018; Rigort et al., 2010; Schaffer et al., 2017).  
80 Tomograms of septa between vegetative cells revealed numerous putative SJs that  
81 appeared as tubular structures traversing the septum (Figure 1a/b; Movie S1). In a  
82 200 nm thick lamella, an average of 9.8 SJs were clearly visible (n=21 tomograms),  
83 consistent with the reported number of ~80 nanopores in a septum (Bornikoel et al.,  
84 2017). Structures resembling SJs were never observed in the lateral cell wall. The  
85 cross-sectional density plot of a SJ suggests that a tube structure is inserted into the  
86 septal PG (rather than the PG channel being empty) and the tube lumen density was  
87 relatively low compared to the PG (Figure 2). Depending on the thickness of the

88 septum, the length of the tube module varied between 26 and 79 nm (average 37.9  
89 nm +/- 7.1 nm, n=208, Figure S3), suggesting a multimeric nature of the tube.

90 In addition to the tube module, the tomograms revealed a cytoplasmic cap-like  
91 structure, as well as a plug-like density in the cytoplasmic membrane (CM; Figure  
92 1a/b). Both ends of each SJ comprised cap and plug modules, without any  
93 recognizable differences between both ends. To increase contrast and resolution, we  
94 performed subtomogram averaging of 446 SJ ends (Figure 1c-f; Figure S4, Movie  
95 S2). The average resolved that the 11 nm-wide tube (lumen of 7 nm) made direct  
96 contact with the CM. In contrast to the resolved lipid bilayer in the CM, no bilayer-like  
97 density was observed in the SJ tube wall. This supports the idea of a proteinaceous  
98 building block assembling a multimeric, periplasma-spanning tube and is consistent  
99 with earlier reports (Wilk et al., 2011). The plug (7 nm x 2.5 nm) was sitting at the  
100 end of the tube at the level of the CM. The cap module was a 5-fold rotational  
101 symmetric (Figure S5) dome (8 nm height) covering the tube end. The ceiling had a  
102 diameter of 9.5 nm and was held by five arches with lengths of 8.5 nm.

103

#### 104 **Intercellular communication ceases upon ionophore treatment in a reversible** 105 **manner**

106 The structural complexity of the SJ ends led us to speculate that the assembly might  
107 allow the control of intercellular molecular diffusion. We therefore monitored the  
108 molecular exchange rate upon challenging the membrane potential. Cyanobacterial  
109 intercellular communication was studied previously by monitoring the exchange rate  
110 of fluorescent calcein by fluorescence recovery after photobleaching (FRAP)  
111 (Mullineaux et al., 2008; Nürnberg et al., 2015). Here, before FRAP analysis, we

112 treated cells with carbonyl cyanide 3-chlorophenylhydrazone (CCCP), a  
113 protonophore that uncouples the proton gradient across membranes (Hopfer et al.,  
114 1968). Upon treatment with 50  $\mu\text{M}$  CCCP, 83% of the analyzed cells ceased to  
115 exchange calcein, showing a 'no communication' response (Figure 2a/b; Movie S3).  
116 This is in contrast to the control experiment, where all DMSO-treated cells displayed  
117 'full recovery' of fluorescence (Figure 2a). Further 7% of CCCP-treated cells were  
118 assigned to a 'slow increase' response, since fluorescent recovery was delayed  
119 (started only 20-60 s after bleaching) and reached only <50% of the initial  
120 fluorescence (Figure 2a/b). In 7% of the cells, exchange took place only with a single  
121 neighboring cell. Only 3% of CCCP-treated cells showed a normal 'full recovery'  
122 FRAP response (Figure 2a/b). The fraction of non-communicating cells was CCCP  
123 concentration-dependent (Figure 2c, Figure S6a), having no effect below 0.5  $\mu\text{M}$ .  
124 Concentrations above 50  $\mu\text{M}$  did not further inhibit molecular exchange.

125 To test whether CCCP inhibited cell-cell communication in a reversible manner, cells  
126 were washed after a 50  $\mu\text{M}$  CCCP treatment and incubated in fresh medium for  
127 2.5 h at room temperature. Eighty-five percent of the cells resumed communication,  
128 suggesting that the inhibitory control mechanism was indeed reversible (Figure 2d,  
129 Figure S6b). Cells were also still viable after CCCP treatment (Figure S7). We then  
130 set out to explore whether the re-opening of SJs required the synthesis of new  
131 proteins. Hence, cells were treated with CCCP, washed, and incubated for 2.5 h in  
132 fresh media supplemented with 50  $\mu\text{g}/\text{mL}$  chloramphenicol (inhibiting protein  
133 synthesis) before monitoring the FRAP response (Figure 2d, Figure S6b). Since 72%  
134 of the tested cells were able to restore communication (showing 'full recovery'  
135 response), we concluded that the reversibility of communication was based on an  
136 opening mechanism of SJs that was independent of *de novo* protein synthesis.

137 **Ceased intercellular communication after ionophore treatment coincides with**  
138 **a major structural rearrangement of the septal junction cap**

139 To investigate whether a structural change in the macromolecular architecture of SJs  
140 was involved in the gating of cell-cell communication, we plunge froze CCCP-treated  
141 *Anabaena* cells and acquired tomograms of septal areas. Differences were hardly  
142 detectable in individual tomograms (Figure 3a). However, subtomogram averaging  
143 revealed a striking conformational change in the cap module, whereas the tube and  
144 plug modules remained unchanged (Figure 3b/c/d; Movie S4). Compared to the cap  
145 structure in untreated cells (Figure 3e), the individual arches were not anymore  
146 detectable and the cap did not reveal any detectable openings (Figure 3b, Figure S8;  
147 Movie S5). The structural rearrangement also resulted in a tightening of the cap by  
148 6 nm and the introduction of a small cavity on the ceiling of the cap. It is possible that  
149 the closed confirmation of the cap could arise from rotations of the individual arches  
150 (Figure S9).

151

152 **The cap and plug modules are required to control intercellular communication**  
153 **upon ionophore treatment**

154 Since the conformational switch of SJs from 'open' to 'closed' coincided with the loss  
155 of intercellular molecular diffusion, we analyzed mutants to further explore the  
156 involvement of the different modules in controlling communication. AmiC1, FraC and  
157 FraD were proposed to play important roles in the formation or as structural  
158 components of SJs (Flores et al., 2016). We therefore analyzed respective mutants  
159 by ECT (Figure 4a/b/c) and we also tested their ability to control intercellular  
160 molecular exchange upon ionophore treatment (Figure 4d). The number of SJs was

161 significantly reduced in all tested mutants (*amiC1* mutant SR477,  $\Delta$ *fraD* and  $\Delta$ *fraC*-  
162  $\Delta$ *fraD*), which is consistent with previous quantifications of nanopore arrays  
163 (Bornikoel et al., 2017; Nürnberg et al., 2015). The septa of all mutants were also  
164 wider, which was reflected in the increased SJ average length (Figure S10). A  
165 subtomogram average of the *amiC1* mutant SR477 (Figure 4a) showed that SJs  
166 were in the open state and did not reveal any structural differences compared to the  
167 wildtype. When we monitored intercellular molecular exchange by FRAP, we found  
168 that only 52% of SR477 cells showed ‘full recovery,’ likely based on the low number  
169 of SJs. Upon CCCP treatment, 87% of the analyzed cells showed a ‘no  
170 communication’ response (Figure 4d, Figure S6c), suggesting that the low number of  
171 SJs could mostly still switch to the closed state. The amidase AmiC1 is therefore  
172 unlikely a direct structural component of SJs, consistent with previous assumptions  
173 (Bornikoel et al., 2017; 2018; Lehner et al., 2013; Nürnberg et al., 2015).

174 The SJs of the  $\Delta$ *fraC*- $\Delta$ *fraD* and  $\Delta$ *fraD* mutants lacked the cap and plug modules  
175 (Figure 4b/c). Importantly, none of the analyzed  $\Delta$ *fraC*- $\Delta$ *fraD* cells and only 7% of the  
176  $\Delta$ *fraD* cells showed a ‘no communication’ response upon CCCP treatment, even at  
177 high CCCP concentrations (Figure 4d, Figure S6c). Together, these data suggest  
178 that cap and/or plug are required to close SJs and thereby terminate intercellular  
179 molecular diffusion. Interestingly, FraD comprises five predicted transmembrane  
180 helices and a C-terminal periplasmic segment (Merino-Puerto et al., 2011).  
181 Therefore, FraC and FraD could represent a structural SJ element, and/or be  
182 required for plug/cap assembly.

183 Besides our finding that SJs closed upon the disruption of the membrane potential,  
184 we also tested intercellular communication in the presence of oxidative stress by  
185 treatment with 10 mM H<sub>2</sub>O<sub>2</sub> for 3 h. Similar to the CCCP treatment, the fraction of



186 cells showing the FRAP response 'full recovery' dropped from 100% to 6% (Figure  
187 S11). Consistent with the above data, the  $\Delta fraC\text{-}\Delta fraD$  mutant was impaired in gating  
188 molecular exchange upon H<sub>2</sub>O<sub>2</sub> treatment (Figure S11). In addition to gating under  
189 certain stress conditions and providing a cargo-size cutoff, the complexity of the SJ  
190 architecture might also allow for the selection of specific cargo.

191

## 192 **Conclusion**

193 In conclusion, our data suggest that cyanobacterial SJs are dynamic, gated cell-cell  
194 connections, which reversibly block intercellular molecular diffusion along the  
195 filament upon different types of stress (Figure 5). This challenges the concept of  
196 considering the cyanobacterial filament as a symplast, with SJs providing cytosolic  
197 continuity between the cells — analogous to plasmodesmata. SJs rather reveal  
198 striking similarities to metazoan gap junctions, because they are both gated by a  
199 dynamic conformational change of a proteinaceous macromolecular complex.  
200 Furthermore, just like SJs, gap junction closure is triggered by disruption of the  
201 membrane potential (Hervé and Derangeon, 2013; Obaid et al., 1983; Socolar and  
202 Politoff, 1971). Interestingly, the closure of gap junctions can be only partial (Ek-  
203 Vitorin and Burt, 2013), a phenomenon that might also exist in SJs, considering the  
204 'slow increase' FRAP response (Figure 2b). Finally, gap junction and SJ closure  
205 might operate on a similar time scale, since we found that intercellular  
206 communication already ceased in less than four minutes after CCCP treatment of  
207 *Anabaena* cells (Figure S12).

208 Cryotomography imaging of the cyanobacterial model organisms *Nostoc punctiforme*  
209 PCC 73102 and *Trichodesmium erythraeum* IMS101 showed similar SJ

210 architectures (Figure S13). Together with the conservation of *fraC*, *fraD* and *amiC*  
211 genes in their genomes, this points towards a conserved SJ mechanism across  
212 diverse members of the phylum. The branching of the cyanobacterial order  
213 *Nostocales* (comprising the genus *Anabaena*) was estimated to date back more than  
214 two billion years ago (Schirrmeister et al., 2013). Our data thus provide a  
215 mechanistic framework for an ancient cell-cell connection structure, predating  
216 metazoan gap junctions by more than a billion years. The convergent evolution of a  
217 dynamic gated mechanism in such divergent lineages emphasizes the importance of  
218 controlling molecular exchange in order to stop communication under certain  
219 metabolic conditions, or upon predation or fragmentation. Avoiding leakage of the  
220 cytoplasm prevents the death of the entire multicellular organism.

221 **References**

222 Berendt, S., Lehner, J., Zhang, Y.V., Rasse, T.M., Forchhammer, K., and Maldener,  
223 I. (2012). Cell wall amidase AmiC1 is required for cellular communication and  
224 heterocyst development in the cyanobacterium *Anabaena* PCC 7120 but not for  
225 filament integrity. *J. Bacteriol.* *194*, 5218–5227.

226 Bornikoel, J., Carrión, A., Fan, Q., Flores, E., Forchhammer, K., Mariscal, V.,  
227 Mullineaux, C.W., Pérez, R., Silber, N., Wolk, C.P., et al. (2017). Role of Two Cell  
228 Wall Amidases in Septal Junction and Nanopore Formation in the Multicellular  
229 Cyanobacterium *Anabaena* sp. PCC 7120. *Front Cell Infect Microbiol* *7*, 386.

230 Bornikoel, J., Staiger, J., Madlung, J., Forchhammer, K., and Maldener, I. (2018).  
231 LytM factor Alr3353 affects filament morphology and cell-cell communication in the  
232 multicellular cyanobacterium *Anabaena* sp. PCC 7120. *Molecular Microbiology* *108*,  
233 187–203.

234 Brunet, T., and King, N. (2017). The Origin of Animal Multicellularity and Cell  
235 Differentiation. *Developmental Cell* *43*, 124–140.

236 Burnat, M., Herrero, A., and Flores, E. (2014). Compartmentalized cyanophycin  
237 metabolism in the diazotrophic filaments of a heterocyst-forming cyanobacterium.  
238 *Proc. Natl. Acad. Sci. USA* *111*, 3823–3828.

239 Cumino, A.C., Marcozzi, C., Barreiro, R., and Salerno, G.L. (2007). Carbon cycling in  
240 *Anabaena* sp. PCC 7120. Sucrose synthesis in the heterocysts and possible role in  
241 nitrogen fixation. *Plant Physiol.* *143*, 1385–1397.

- 242 Ek-Vitorin, J.F., and Burt, J.M. (2013). Structural basis for the selective permeability  
243 of channels made of communicating junction proteins. *Biochim. Biophys. Acta* 1828,  
244 51–68.
- 245 Flores, E., Herrero, A., Forchhammer, K., and Maldener, I. (2016). Septal Junctions  
246 in Filamentous Heterocyst-Forming Cyanobacteria. *Trends in Microbiology* 24, 79–  
247 82.
- 248 Hervé, J.-C., and Derangeon, M. (2013). Gap-junction-mediated cell-to-cell  
249 communication. *Cell Tissue Res.* 352, 21–31.
- 250 Hopfer, U., Lehninger, A.L., and Thompson, T.E. (1968). Protonic conductance  
251 across phospholipid bilayer membranes induced by uncoupling agents for oxidative  
252 phosphorylation. *Proc. Natl. Acad. Sci. USA* 59, 484–490.
- 253 Iancu, C.V., Tivol, W.F., Schooler, J.B., Dias, D.P., Henderson, G.P., Murphy, G.E.,  
254 Wright, E.R., Li, Z., Yu, Z., Briegel, A., et al. (2006). Electron cryotomography  
255 sample preparation using the Vitrobot. *Nat Protoc* 1, 2813–2819.
- 256 Jüttner, F. (1983). <sup>14</sup>C-labeled metabolites in heterocysts and vegetative cells of  
257 *Anabaena cylindrica* filaments and their presumptive function as transport vehicles of  
258 organic carbon and nitrogen. *J. Bacteriol.* 155, 628–633.
- 259 Lehner, J., Berendt, S., Dörsam, B., Pérez, R., Forchhammer, K., and Maldener, I.  
260 (2013). Prokaryotic multicellularity: a nanopore array for bacterial cell  
261 communication. *Faseb J.* 27, 2293–2300.

- 262 Marko, M., Hsieh, C., Schalek, R., Frank, J., and Mannella, C. (2007). Focused-ion-  
263 beam thinning of frozen-hydrated biological specimens for cryo-electron microscopy.  
264 *Nature Methods* 4, 215–217.
- 265 Mastronarde, D.N. (2008). Correction for non-perpendicularity of beam and tilt axis in  
266 tomographic reconstructions with the IMOD package. *J Microsc* 230, 212–217.
- 267 Medeiros, J.M., Böck, D., Weiss, G.L., Kooger, R., Wepf, R.A., and Pilhofer, M.  
268 (2018). Robust workflow and instrumentation for cryo-focused ion beam milling of  
269 samples for electron cryotomography. *Ultramicroscopy* 190, 1–11.
- 270 Merino-Puerto, V., Mariscal, V., Mullineaux, C.W., Herrero, A., and Flores, E. (2010).  
271 Fra proteins influencing filament integrity, diazotrophy and localization of septal  
272 protein SepJ in the heterocyst-forming cyanobacterium *Anabaena* sp. *Molecular*  
273 *Microbiology* 75, 1159–1170.
- 274 Merino-Puerto, V., Schwarz, H., Maldener, I., Mariscal, V., Mullineaux, C.W.,  
275 Herrero, A., and Flores, E. (2011). FraC/FraD-dependent intercellular molecular  
276 exchange in the filaments of a heterocyst-forming cyanobacterium, *Anabaena* sp.  
277 *Molecular Microbiology* 82, 87–98.
- 278 Mullineaux, C.W., Mariscal, V., Nenninger, A., Khanum, H., Herrero, A., Flores, E.,  
279 and Adams, D.G. (2008). Mechanism of intercellular molecular exchange in  
280 heterocyst-forming cyanobacteria. *Embo J.* 27, 1299–1308.
- 281 Nicastro, D., Schwartz, C., Pierson, J., Gaudette, R., Porter, M.E., and McIntosh,  
282 J.R. (2006). The molecular architecture of axonemes revealed by cryoelectron  
283 tomography. *Science* 313, 944–948.

- 284 Nieves-Mori3n, M., Mullineaux, C.W., and Flores, E. (2017). Molecular Diffusion  
285 through Cyanobacterial Septal Junctions. *MBio* 8, e01756–16.
- 286 N3urnberg, D.J., Mariscal, V., Bornikoel, J., Nieves-Mori3n, M., Krau3, N., Herrero, A.,  
287 Maldener, I., Flores, E., and Mullineaux, C.W. (2015). Intercellular diffusion of a  
288 fluorescent sucrose analog via the septal junctions in a filamentous cyanobacterium.  
289 *MBio* 6, e02109.
- 290 Obaid, A.L., Socolar, S.J., and Rose, B. (1983). Cell-to-cell channels with two  
291 independently regulated gates in series: analysis of junctional conductance  
292 modulation by membrane potential, calcium, and pH. *J. Membr. Biol.* 73, 69–89.
- 293 Oparka, K.J., Roberts, A.G., Boevink, P., Santa Cruz, S., Roberts, I., Pradel, K.S.,  
294 Imlau, A., Kotlizky, G., Sauer, N., and Epel, B. (1999). Simple, but not branched,  
295 plasmodesmata allow the nonspecific trafficking of proteins in developing tobacco  
296 leaves. *Cell* 97, 743–754.
- 297 Pettersen, E.F., Goddard, T.D., Huang, C.C., Couch, G.S., Greenblatt, D.M., Meng,  
298 E.C., and Ferrin, T.E. (2004). UCSF Chimera--a visualization system for exploratory  
299 research and analysis. *J Comput Chem* 25, 1605–1612.
- 300 Rigort, A., B3auerlein, F.J.B., Leis, A., Gruska, M., Hoffmann, C., Laugks, T., B3hm,  
301 U., Eibauer, M., Gnaegi, H., Baumeister, W., et al. (2010). Micromachining tools and  
302 correlative approaches for cellular cryo-electron tomography. *Journal of Structural*  
303 *Biology* 172, 169–179.
- 304 Rippka, R., Deruelles, J., Herdman, M., Waterbury, J.B., and Stanier, R.Y. (1979).  
305 Generic Assignments, Strain Histories and Properties of Pure Cultures of  
306 Cyanobacteria. *Microbiology* 111, 1–61.

- 307 Sager, R., and Lee, J.-Y. (2014). Plasmodesmata in integrated cell signalling:  
308 insights from development and environmental signals and stresses. *J. Exp. Bot.* *65*,  
309 6337–6358.
- 310 Schaffer, M., Engel, B.D., Laugks, T., Mahamid, J., Plitzko, J.M., and Baumeister, W.  
311 (2015). Cryo-focused Ion Beam Sample Preparation for Imaging Vitreous Cells by  
312 Cryo-electron Tomography. *Bio Protoc* *5*.
- 313 Schaffer, M., Mahamid, J., Engel, B.D., Laugks, T., Baumeister, W., and Plitzko, J.M.  
314 (2017). Optimized cryo-focused ion beam sample preparation aimed at in situ  
315 structural studies of membrane proteins. *Journal of Structural Biology* *197*, 73–82.
- 316 Schindelin, J., Arganda-Carreras, I., Frise, E., Kaynig, V., Longair, M., Pietzsch, T.,  
317 Preibisch, S., Rueden, C., Saalfeld, S., Schmid, B., et al. (2012). Fiji: an open-source  
318 platform for biological-image analysis. *Nature Methods* *9*, 676–682.
- 319 Schirrmester, B.E., de Vos, J.M., Antonelli, A., and Bagheri, H.C. (2013). Evolution  
320 of multicellularity coincided with increased diversification of cyanobacteria and the  
321 Great Oxidation Event. *Proc. Natl. Acad. Sci. USA* *110*, 1791–1796.
- 322 Socolar, S.J., and Politoff, A.L. (1971). Uncoupling Cell Junctions in a Glandular  
323 Epithelium by Depolarizing Current. *Science* *172*, 492–494.
- 324 Thomas, J., Meeks, J.C., Wolk, C.P., Shaffer, P.W., and Austin, S.M. (1977).  
325 Formation of glutamine from [<sup>13</sup>n]ammonia, [<sup>13</sup>n]dinitrogen, and [<sup>14</sup>C]glutamate by  
326 heterocysts isolated from *Anabaena cylindrica*. *J. Bacteriol.* *129*, 1545–1555.
- 327 Tivol, W.F., Briegel, A., and Jensen, G.J. (2008). An Improved Cryogen for Plunge  
328 Freezing. *Microscopy and Microanalysis* *14*, 375–379.

- 329 Unwin, P.N.T., and Zampighi, G. (1980). Structure of the junction between  
330 communicating cells. *Nature* 283, 545–549.
- 331 Weiss, G.L., Medeiros, J.M., and Pilhofer, M. (2017). In Situ Imaging of Bacterial  
332 Secretion Systems by Electron Cryotomography. *Methods Mol. Biol.* 1615, 353–375.
- 333 Wilk, L., Strauss, M., Rudolf, M., Nicolaisen, K., Flores, E., Kühlbrandt, W., and  
334 Schleiff, E. (2011). Outer membrane continuity and septosome formation between  
335 vegetative cells in the filaments of *Anabaena* sp. PCC 7120. *Cell. Microbiol.* 13,  
336 1744–1754.
- 337 Zheng, S.Q., Keszthelyi, B., Branlund, E., Lyle, J.M., Braunfeld, M.B., Sedat, J.W.,  
338 and Agard, D.A. (2007). UCSF tomography: An integrated software suite for real-  
339 time electron microscopic tomographic data collection, alignment, and  
340 reconstruction. *Journal of Structural Biology* 157, 138–147.

341

## 342 **Acknowledgments**

343 We thank P. Tittmann and C. Zaubitzer for technical support as well as ScopeM for  
344 instrument access at ETH Zürich. We thank Hannah Minas for help in preparing  
345 samples and analyzing the data. Jörn Piel and Anna Vagstaad are acknowledged for  
346 providing *Anabaena* and *Nostoc punctiforme* cultures for preliminary observations.  
347 We thank Ulrike Pfreundt and Roman Stocker for providing *Trichodesmium*  
348 *erythraeum* cultures. We thank Enrique Flores for providing FraC and FraC/FraD  
349 double mutants. Fabian Eisenstein is acknowledged for help with movies. GLW was  
350 supported by a Boehringer Ingelheim Fonds PhD fellowship. Work in Tübingen was  
351 supported by the Deutsche Forschungsgemeinschaft (SFB766). MP was supported



352 by the Swiss National Science Foundation, the European Research Council and the  
353 Helmut Horten Foundation. Subtomogram averages were deposited in the Electron  
354 Microscopy Data Bank (accession numbers ##).

355

### 356 **Author contributions**

357 GLW and AKK contributed equally. IM, KF and MP conceptualized the study. All  
358 authors designed experiments. GLW and AKK performed experiments. All authors  
359 analyzed data. All authors participated in writing the manuscript.

360 Correspondence to pilhofer@biol.ethz.ch and iris.maldener@uni-tuebingen.de.

361 Lead contact: pilhofer@biol.ethz.ch.

362

### 363 **Declaration of Interests**

364 The authors declare no competing interests.

365

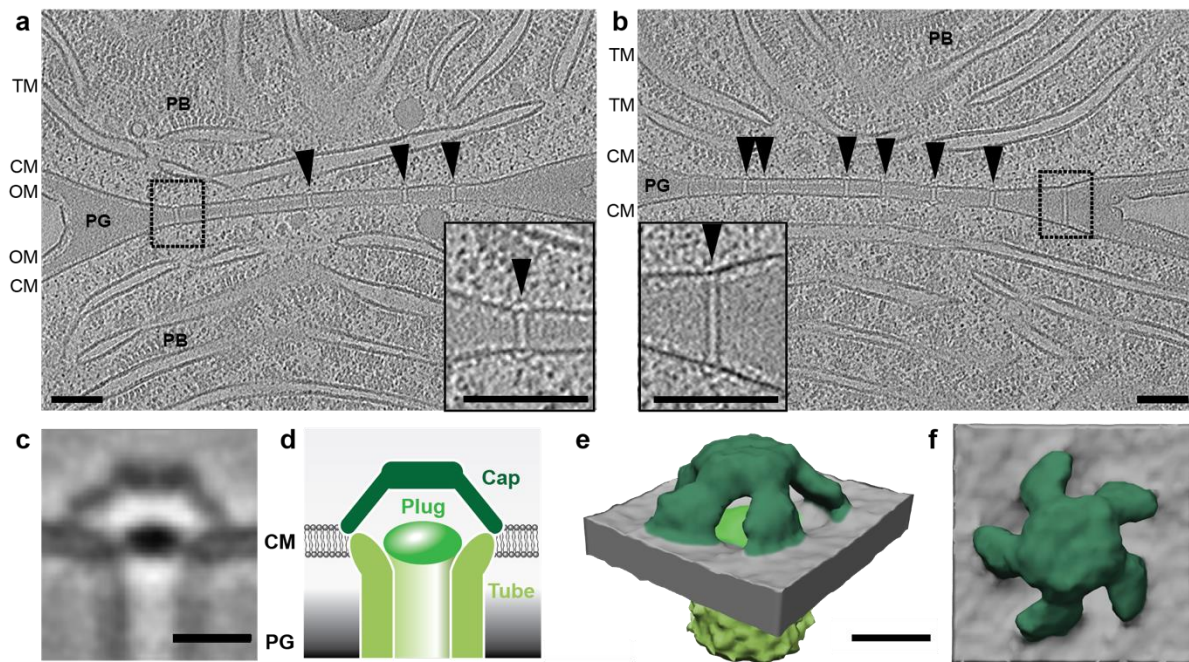

366

367 **Figure 1. *In situ* architecture of septal junctions reveals tube, plug and cap**  
368 **modules**

369 **a, b:** Cryotomograms (magnified views in boxes) of a FIB-milled *Anabaena* filament.  
370 The two different slices at different Z-heights show the septum between adjacent  
371 vegetative cells. Multiple SJs are seen crossing the septum (arrowheads), which are  
372 precisely adjusted to the septum thickness. CM, cytoplasmic membrane; OM, outer  
373 membrane; PB, phycobilisomes; PG, septal peptidoglycan; TM, thylakoid  
374 membranes. Bars, 100 nm. Shown are projections of 13.5 nm thick slices.

375 **c-f:** Subtomogram averaging of SJ ends revealed three structural modules: tube, cap  
376 and plug. Shown is a 0.68 nm-thick tomographic slice through the average (c), a  
377 schematic representation of SJ modules (d; modules segmented in different shades  
378 of green), and oblique (e) and top (f) views of a surface representation (modules  
379 were segmented to match colors in d). The cap consisted of a ceiling that was held  
380 by five arches. Bars, 10 nm.

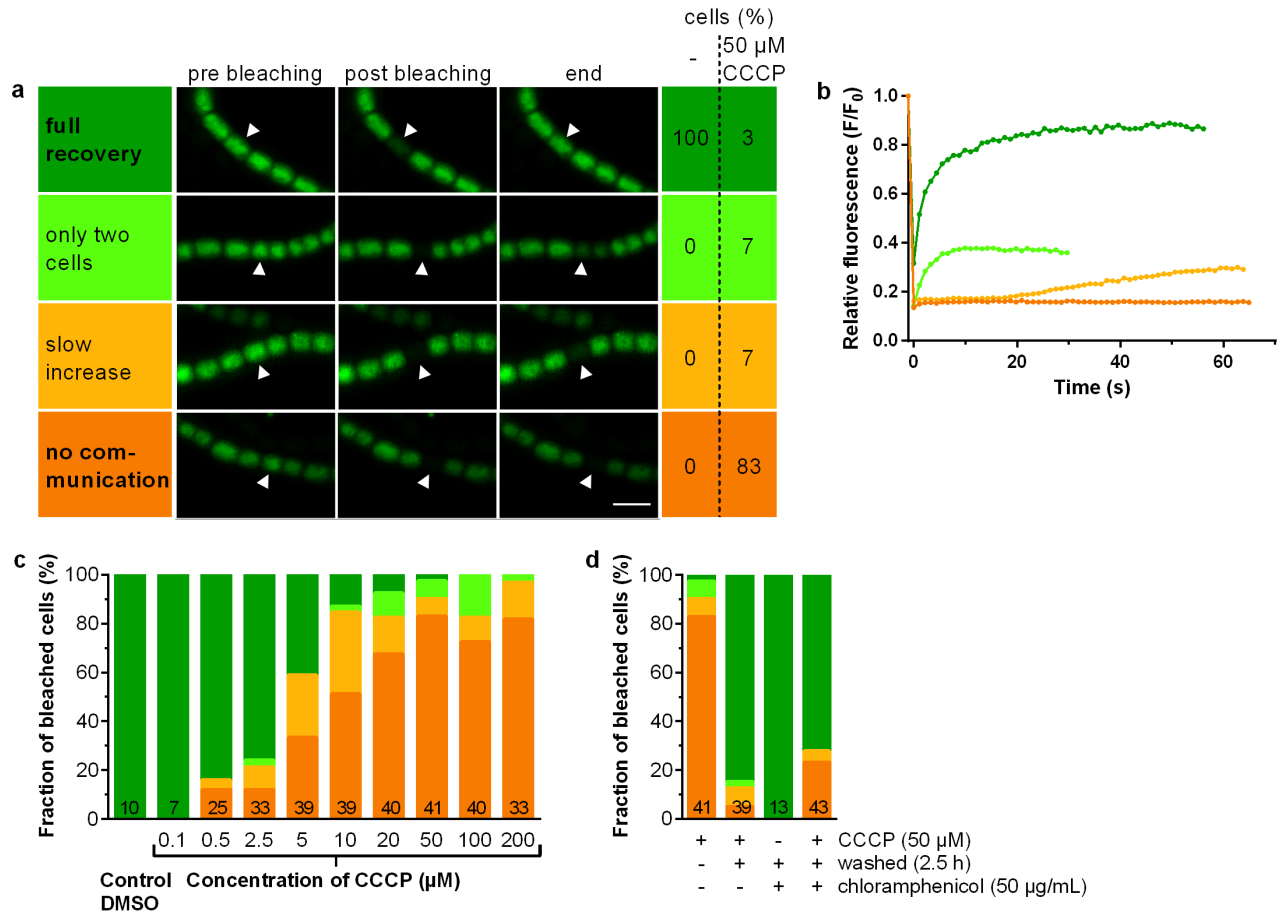

381

382 **Figure 2. Intercellular communication ceases upon ionophore treatment in a**  
 383 **reversible manner**

384 **a:** Shown is FRAP analysis of cells that were stained with fluorescent calcein. In the  
 385 control experiment (DMSO), all cells showed full recovery of fluorescence after  
 386 bleaching. When the culture was treated with the ionophore CCCP (50  $\mu\text{M}$ ), the  
 387 bleached cells showed four different types of FRAP responses: ‘no communication’  
 388 (no recovery), ‘slow increase’ (delayed recovery to <50% of original fluorescence),  
 389 ‘only two cells’ (exchange of calcein only with one neighboring cell), and ‘full  
 390 recovery’. For each FRAP response, representative images are shown at three  
 391 time points (5 s before bleaching, ~0.5 s after bleaching, 30-60 s after bleaching).  
 392 Arrowheads point to the bleached cells. *Anabaena* was apparently able to control

393 communication upon disruption of the membrane potential, since the majority of  
394 CCCP-treated cells showed 'no communication. Bar 5  $\mu\text{m}$ .

395 **b:** Shown are fluorescence recovery curves corresponding to the four FRAP  
396 responses that were observed in 'a' (color scheme identical to 'a'). Time point  $t=0$   
397 shows the analyzed cell directly after bleaching.

398 **c:** The quantification of FRAP responses (color scheme identical to 'a') indicates that  
399 the effect of CCCP on cell-cell communication was concentration-dependent for  
400 CCCP concentrations between 0.5-50  $\mu\text{M}$ . In the control experiment, cells were  
401 treated with 0.002% DMSO. Numbers within the bars indicate the number of  
402 analyzed cells  $n$  from different filaments and represent cumulated results from at  
403 least 2 independent cultures (except for 0.1  $\mu\text{M}$  CCCP). Results of independent  
404 cultures are shown in Figure S6a.

405 **d:** CCCP-mediated control of cell-cell communication was reversible, since  
406 communication was observed after incubation in fresh medium lacking CCCP (color  
407 scheme identical to 'a'). Regaining cell-cell communication was independent of *de*  
408 *novo* protein synthesis, shown by the experiment that was conducted in the  
409 presence of chloramphenicol (inhibiting protein synthesis). '+' and '-' indicate the  
410 presence and absence of CCCP, washing in fresh medium, and chloramphenicol.  
411 Numbers in bars indicate number of analyzed cells  $n$ . Shown are cumulated results  
412 from at least two independent cultures. Results of independent cultures are shown in  
413 Figure S6b.

414

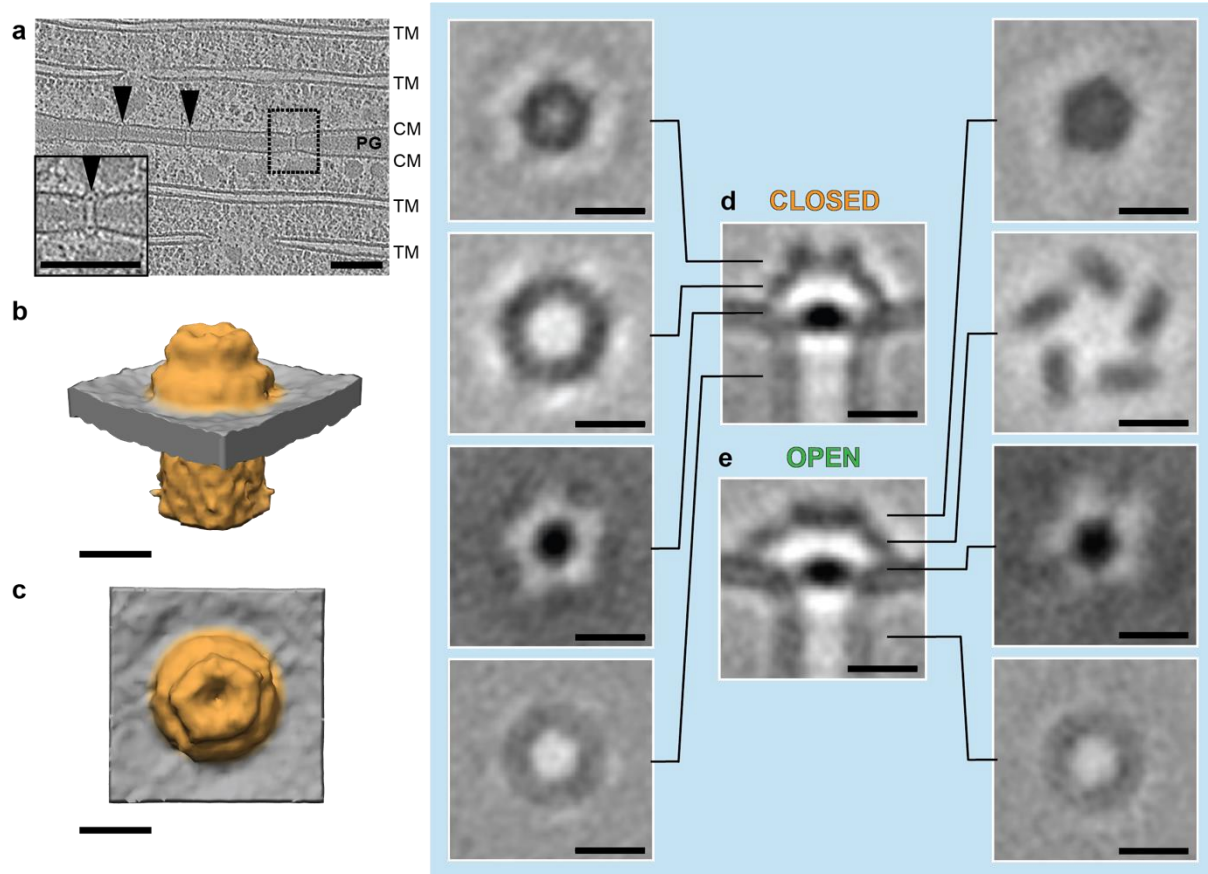

415

416 **Figure 3. Ceased intercellular communication after ionophore treatment**  
417 **coincides with a major structural rearrangement of the septal junction cap**

418 **a:** Shown is a 13.5 nm-thick slice through a cryotomogram (magnified view in box) of  
419 the septal area of a CCCP-treated *Anabaena* filament. SJs are indicated by  
420 arrowheads. CM, cytoplasmic membrane; PG, septal peptidoglycan; TM, thylakoid  
421 membranes. Bar, 100 nm.

422 **b-e:** Subtomogram averaging of SJs in the CCCP-treated non-communicating  
423 'closed' state (b-d) revealed major structural rearrangements in the cap module,  
424 compared to the 'open' state (e). Shown are surface representations (b/c), and  
425 longitudinal and cross-sectional slices (0.68 nm) through the averages (d/e). Sliced  
426 positions are indicated in d/e. Bars, 10 nm.

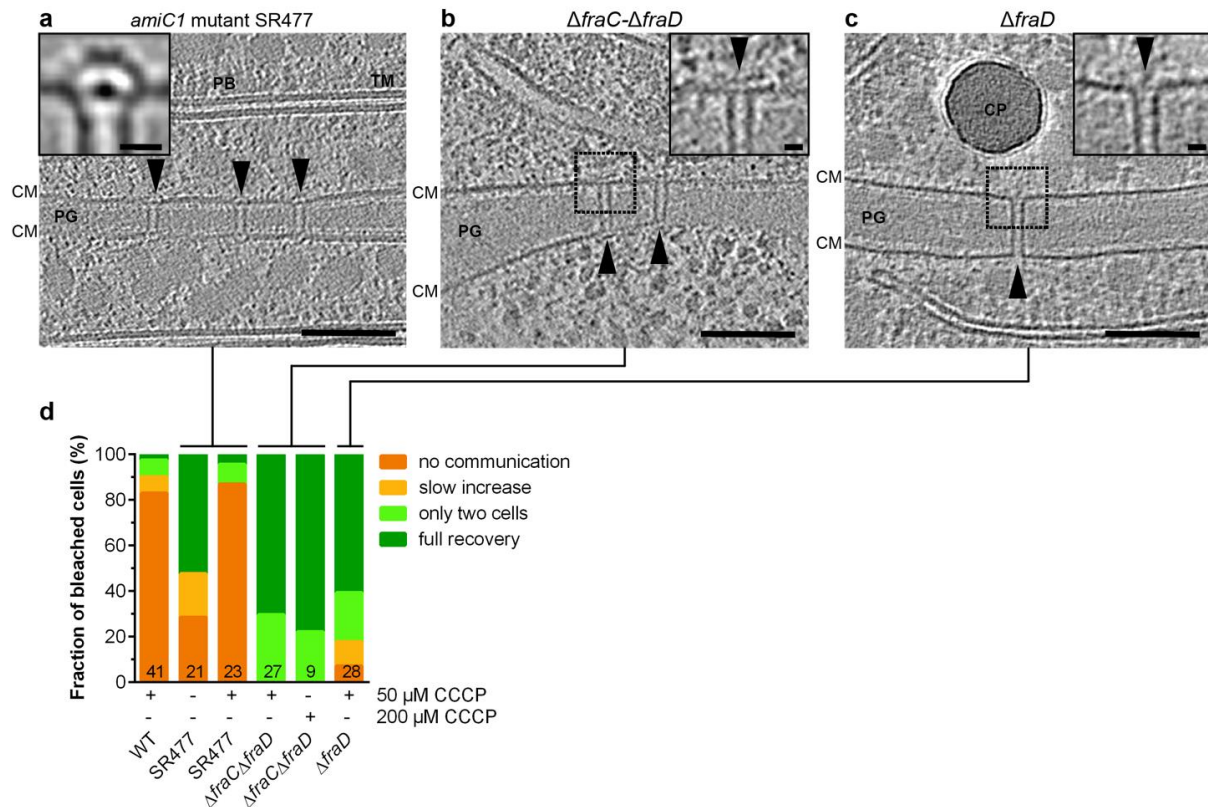

427

428

**Figure 4. The cap and plug modules are required to control intercellular communication upon ionophore treatment**

429

430

**a-c:** The cryotomograms (shown are 13.5 nm-thick projections, bars 100 nm) of different *Anabaena* mutants showed that the number of SJs (arrowheads) was significantly reduced. SJs from the *amiC1* mutant SR477 were in the open state and revealed no differences compared to the wildtype (a, inset shows subtomogram average; 0.68 nm thick slice; bar 10 nm). SJs from the  $\Delta fraC-\Delta fraD$  (b) and  $\Delta fraD$  (c) mutants were missing the cap and plug modules (insets show magnified views, bars 10 nm). CM, cytoplasmic membrane; CP, cyanophycin; PB, phycobilisomes; PG, septal peptidoglycan; TM, thylakoid membranes.

437

438

**d:** FRAP responses of the *amiC1* mutant SR477 showed that compared to the wildtype, a reduced fraction of cells was able to communicate already in the absence of CCCP (likely based on the lower total number of SJs). However, the open SJs of

439

440

441 SR477 were able to close upon CCCP treatment, consistent with the presence of  
442 cap/plug in the structure. The  $\Delta fraD$  and  $\Delta fraC\text{-}\Delta fraD$  mutants were unable to close  
443 SJs upon CCCP treatment, consistent with the absence of cap/plug modules.  
444 Numbers within the bars indicate the number of analyzed cells  $n$  from different  
445 filaments. Results from at least two independent cultures were cumulated (except for  
446  $\Delta fraC\text{-}\Delta fraD$  treated with 200  $\mu\text{M}$  CCCP). Results of independent cultures are shown  
447 in Figure S6c.

448

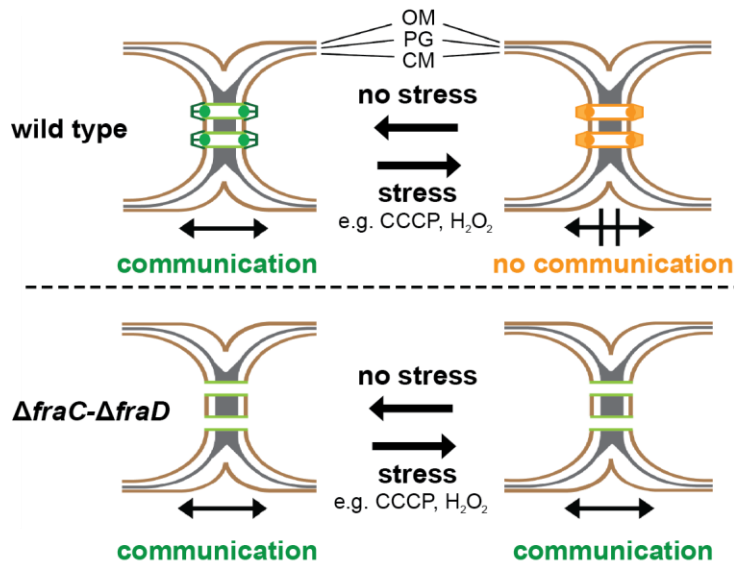

449

450 **Figure 5: SJs reversibly gate cell-cell communication by a conformational**

451 **change**

452 SJs (green, open; orange, closed) of *Anabaena* are dynamic, gated cell-cell

453 connections, which reversibly block intercellular molecular diffusion along the

454 filament upon different types of stress. The  $\Delta fraD$  and  $\Delta fraC-\Delta fraD$  mutants were

455 missing the cap and plug modules, consistent with the inability to close SJs upon

456 stress.
